# Supplementary material for: NLRP3 Deficiency in Hepatocellular Carcinoma Enhances Surveillance of NK-92 through a Modulation of MICA/B
Source: MDPI journal article supplement (doi:10.3390/ijms22179285), 2021-08-27
Supplement: s1 [file s1]

Supplementary Materials

# NLRP3 Deficiency in Hepatocellular Carcinoma Enhances Surveillance of NK-92 through a Modulation of MICA/B

Hwan Hee Lee <sup>1,2</sup>, Dongoh Kim <sup>2</sup>, Joohee Jung <sup>1,2</sup>, Hyojeung Kang <sup>3,\*</sup>, and Hyosun Cho <sup>1,2,\*</sup>

Supplementary figures

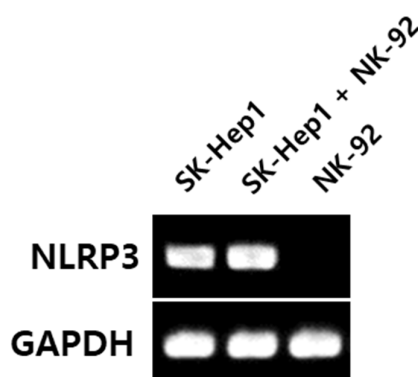

**Figure S1.** Expression of NLRP3 in HCC SK-Hep1 Luc cells with or without a coculture with NK-92.

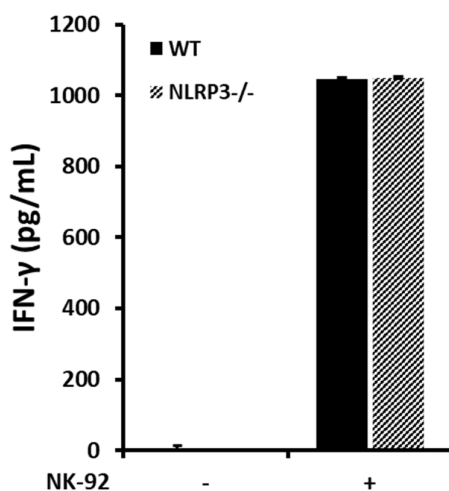

**Figure S2.** The secretion of IFN-γ between HCC SK-Hep1 Luc cells and NK-92 cells.

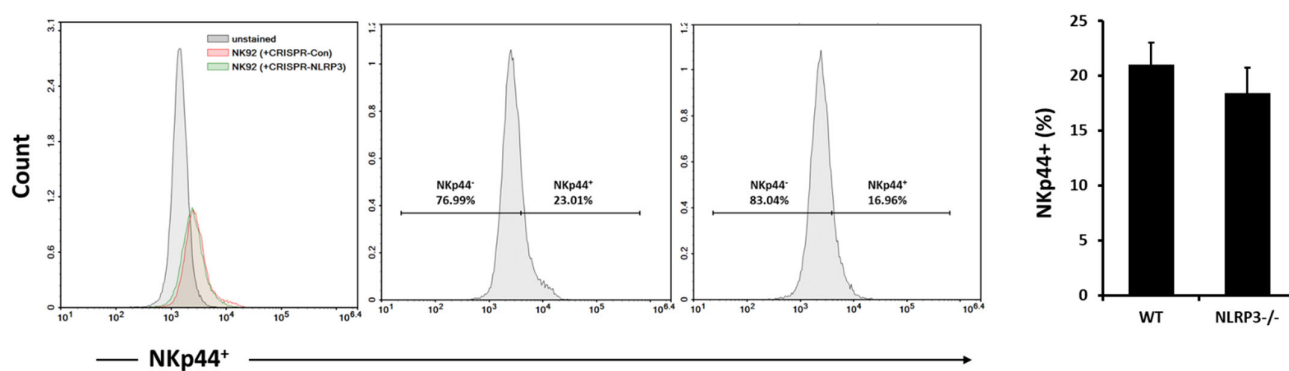

**Figure S3.** Expression of NKp44 on NK-92 cells in a co-culture of HCC SK-Hep1 Luc cells.
